# Supplementary material
Source: MDPI journal article supplement (https://www.mdpi.com/2077-0472/11/12/1224)
Supplement: s1 [file s1 › agriculture-1462457-supplementary.pdf]

# Supplementary Materials

## Figures

**Figure S1. Composition of the bacterial community.** A; Community heatmap at the genus level, B; Circos plot of bacterial phyla. LZ, HY2, HY6, HW2, HW6, HH, HB, HS, and LH; continuous cropping of *C. chinensis* for 5 years, maize continuous cropping for 2 years, maize continuous cropping for 6 years, *P. multiflorum* continuous cropping for 2 years, *P. multiflorum* continuous cropping for 6 years, sweet potato continuous cropping for 2 years, *F. thunbergia* continuous cropping for 2 years, cabbage continuous cropping for 2 years, fallow field, respectively.

**Figure S2. Rarefaction curve of the bacterial community.** LZ, HY2, HY6, HW2, HW6, HH, HB, HS, and LH; continuous cropping of *C. chinensis* for 5 years, maize continuous cropping for 2 years, maize continuous cropping for 6 years, *P. multiflorum* continuous cropping for 2 years, *P. multiflorum* continuous cropping for 6 years, sweet potato continuous cropping for 2 years, *F. thunbergia* continuous cropping for 2 years, cabbage continuous cropping for 2 years, fallow field, respectively.

**Figure S3. Hierarchical clustering analysis.** LZ, HY2, HY6, HW2, HW6, HH, HB, HS, and LH; continuous cropping of *C. chinensis* for 5 years, maize continuous cropping for 2 years, maize continuous cropping for 6 years, *P. multiflorum* continuous cropping for 2 years, *P. multiflorum* continuous cropping for 6 years, sweet potato continuous cropping for 2 years, *F. thunbergia* continuous cropping for 2 years, cabbage continuous cropping for 2 years, fallow field, respectively.

## Tables

**Table S1.** Redundancy analysis of soil physicochemical properties and bacterial phyla.

**Table S2.** Redundancy analysis of soil enzyme activities and bacterial phyla.

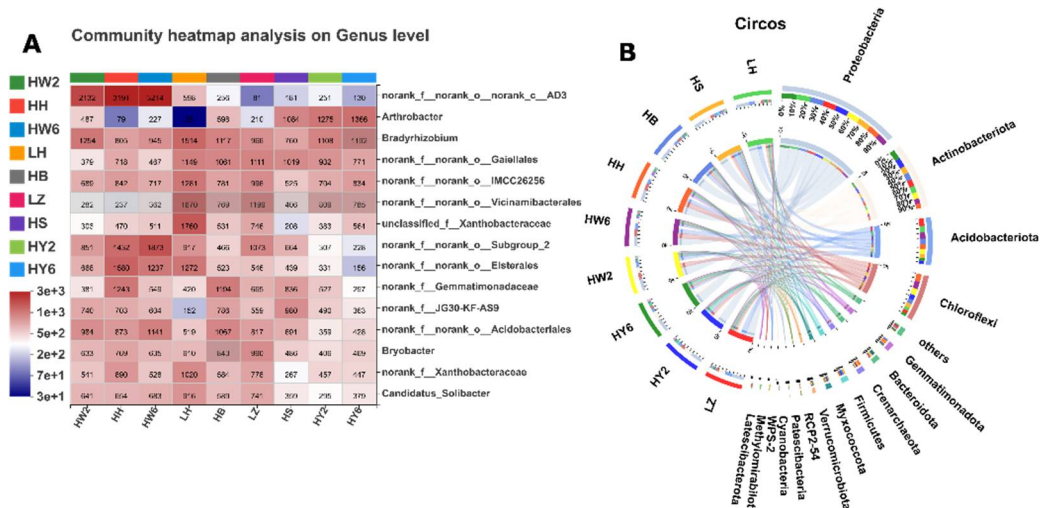

**Figure S1. Composition of the bacterial community.** A; Community heatmap at the genus level, B; Circos plot of bacterial phyla. LZ, HY2, HY6, HW2, HW6, HH, HB, HS, and LH; continuous cropping of *C. chinensis* for 5 years, maize continuous cropping for 2 years, maize continuous cropping for 6 years, *P. multiflorum* continuous cropping for 2 years, *P. multiflorum* continuous cropping for 6 years, sweet potato continuous cropping for 2 years, *F. thunbergia* continuous cropping for 2 years, cabbage continuous cropping for 2 years, fallow field, respectively.

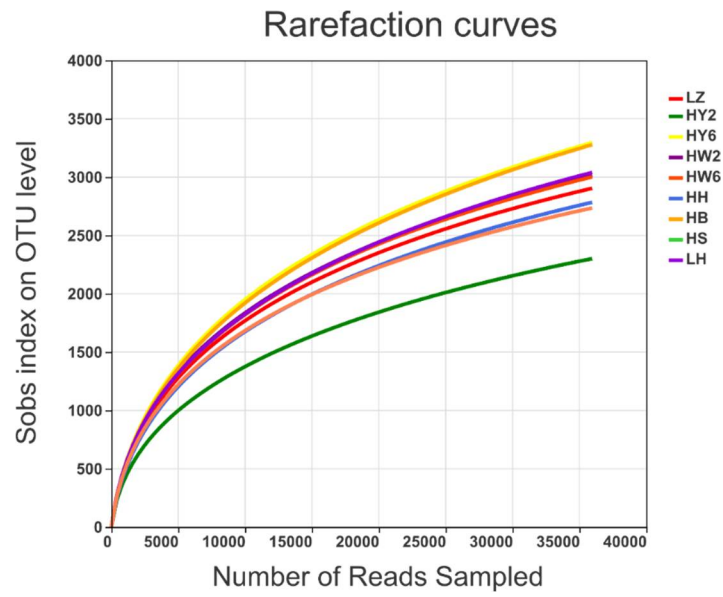

**Figure S2. Rarefaction curve of the bacterial community.** LZ, HY2, HY6, HW2, HW6, HH, HB, HS, and LH; continuous cropping of *C. chinensis* for 5 years, maize continuous cropping for 2 years, maize continuous cropping for 6 years, *P. multiflorum* continuous cropping for 2 years, *P. multiflorum* continuous cropping for 6 years, sweet potato continuous cropping for 2 years, *F. thunbergia* continuous cropping for 2 years, cabbage continuous cropping for 2 years, fallow field, respectively.

## Hierarchical clustering tree on OTU level

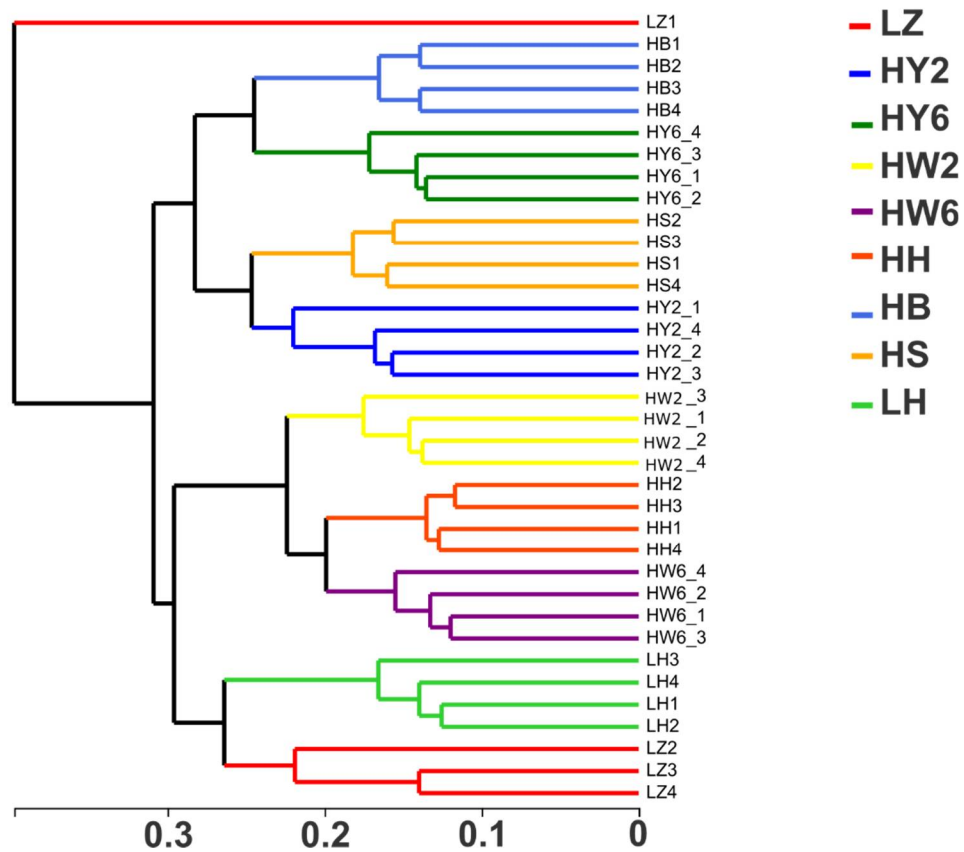

**Figure S3. Hierarchical clustering analysis.** LZ, HY2, HY6, HW2, HW6, HH, HB, HS, and LH; continuous cropping of *C. chinensis* for 5 years, maize continuous cropping for 2 years, maize continuous cropping for 6 years, *P. multiflorum* continuous cropping for 2 years, *P. multiflorum* continuous cropping for 6 years, sweet potato continuous cropping for 2 years, *F. thunbergia* continuous cropping for 2 years, cabbage continuous cropping for 2 years, fallow field, respectively.

**Table S1.** Redundancy analysis of soil physicochemical properties and bacterial phyla.

| Physicochemical Properties | RDA1    | RDA2    | r <sup>2</sup> | <i>p</i> -Value |
|----------------------------|---------|---------|----------------|-----------------|
| TP                         | 0.2855  | −0.9584 | 0.3006         | 0.002           |
| TN                         | −0.3506 | −0.9365 | 0.3215         | 0.003           |
| AP                         | 0.1757  | −0.9844 | 0.2317         | 0.011           |
| AK                         | 0.7948  | −0.6069 | 0.2242         | 0.018           |
| AN                         | −0.2876 | −0.9577 | 0.1829         | 0.024           |
| OM                         | −0.6083 | −0.7937 | 0.1204         | 0.109           |
| pH                         | 0.8636  | −0.5042 | 0.0797         | 0.219           |
| TK                         | 0.3774  | −0.9261 | 0.0544         | 0.346           |

TP; total phosphorus, TN; total content of nitrogen, TK; total content of potassium, AP; available phosphorus, AN; available nitrogen, AK; available potassium, OM; organic matter.

**Table S2.** Redundancy analysis of soil enzyme activities and bacterial phyla.

| Soil Enzyme Activities | RDA1    | RDA2    | r <sup>2</sup> | <i>p</i> -Value |
|------------------------|---------|---------|----------------|-----------------|
| URE                    | −0.872  | −0.4896 | 0.4783         | 0.001           |
| PHO                    | −0.9177 | 0.3972  | 0.4763         | 0.001           |
| INV                    | −0.9974 | 0.0727  | 0.262          | 0.005           |

URE; soil urease activity, PHO; phosphatase activity, INV: sucrose activity.
